# Supplementary material
Source: publisher figshare collection journal article supplement (https://asha.figshare.com/articles/dataset/_/26397106)
Supplement: Supplementary file 1 [file 1]

**Supplemental Material S1.** Search strategies for systematic review.

*2015–2023*

| Database       | Search Strategy                                                                                     | Number of Found Records |
|----------------|-----------------------------------------------------------------------------------------------------|-------------------------|
| PubMed         | ((Vocal Fatigue Index) OR (VFI)) AND ((Validity) OR (Reliability) OR (Translation) OR (Adaptation)) | 474                     |
| CENTRAL        | ((Vocal Fatigue Index) OR (VFI)) AND ((Validity) OR (Reliability) OR (Translation) OR (Adaptation)) | 17                      |
| Web of Science | ((Vocal Fatigue Index) OR (VFI)) AND ((Validity) OR (Reliability) OR (Translation) OR (Adaptation)) | 67                      |
| Google Scholar | "Vocal Fatigue Index" AND ("validation" OR "translation" OR "Adaptation" OR "Reliability")          | 415                     |
