# Supplementary material
Source: publisher figshare collection journal article supplement (https://asha.figshare.com/articles/dataset/_/26397106)
Supplement: Supplementary file 2 [file 1]

Formula for computation.xlsx - Excel

|   | A                 | B        | C                                             | D                                          | E                  | F           | G           | H |
|---|-------------------|----------|-----------------------------------------------|--------------------------------------------|--------------------|-------------|-------------|---|
| 1 |                   |          |                                               |                                            |                    |             |             |   |
| 2 |                   |          | based on Gold standard test                   |                                            |                    |             |             |   |
| 3 |                   |          | Participants With No Voice Problem (negative) | Participants With Voice Problem (positive) | Total Participants | sensitivity | specificity |   |
| 4 | based on New test | negative | 0                                             | 0                                          |                    |             |             |   |
| 5 |                   | positive | 0                                             | 0                                          |                    |             |             |   |
